# Supplementary material for: Rational design of a trispecific antibody targeting the HIV-1 Env with elevated anti-viral activity
Source: PubMed Central journal article supplement (PMC5830440; doi:10.1038/s41467-018-03335-4), 2018-02-28
Supplement: 41467_2018_3335_MOESM1_ESM.pdf [file 41467_2018_3335_MOESM1_ESM.pdf]

## **Supplementary Information**

### **Rational Design of a Trispecific Antibody Targeting the HIV-1 Env with Elevated Anti-viral Activity**

Steinhardt et al.

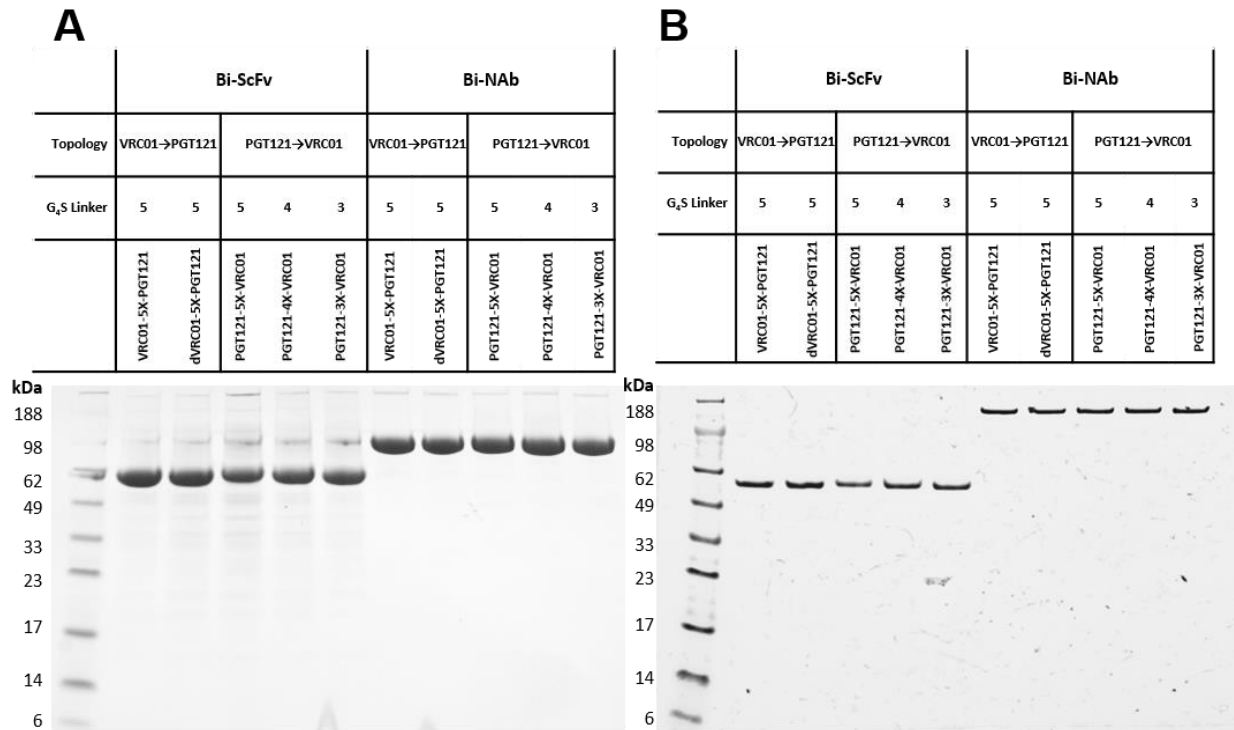

**Supplementary Figure 1. Expression and purification of bispecific antibodies.** (A) Reduced SDS-PAGE analysis of bispecific antibodies. (B) Non-reduced SDS page analysis of bispecific antibodies.

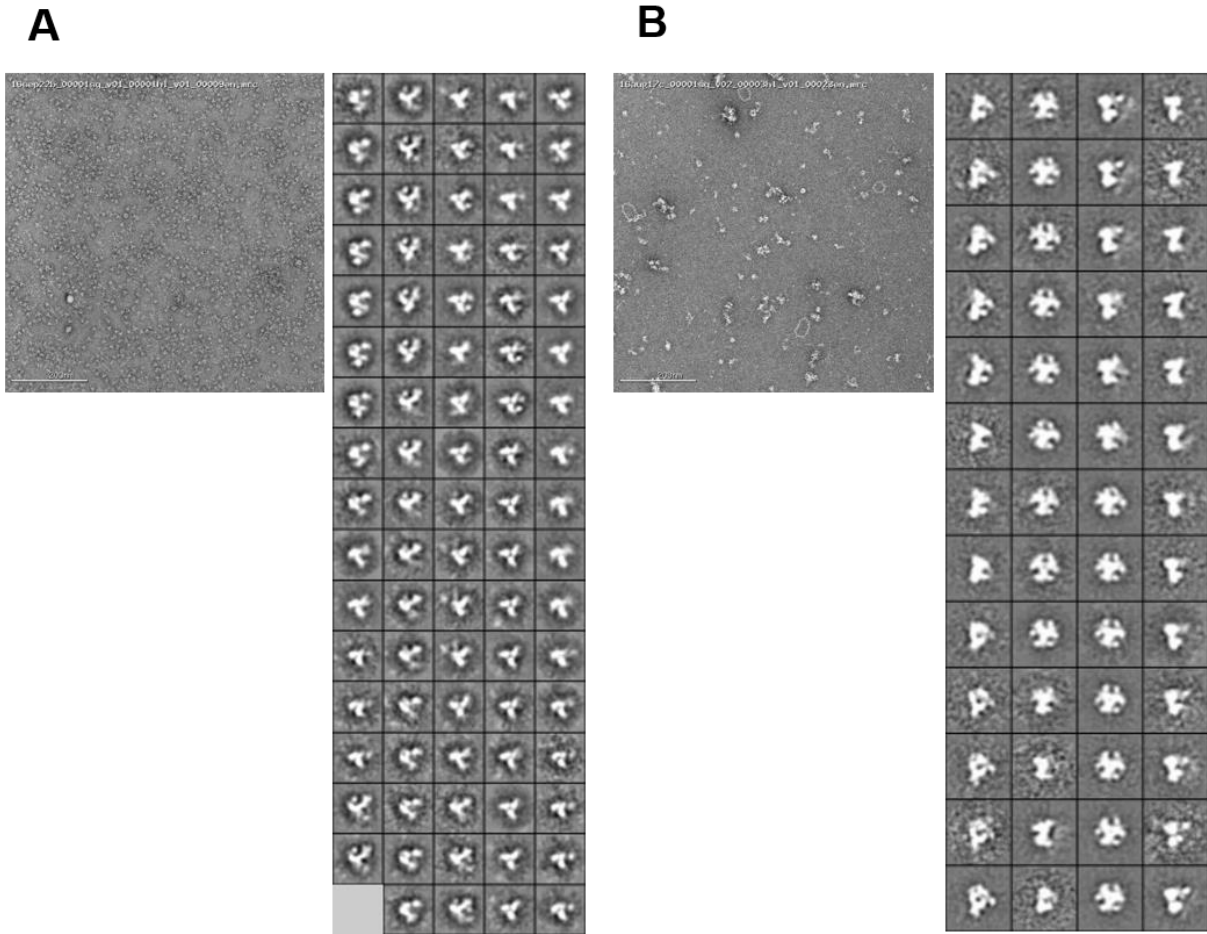

**Supplementary Figure 2. Negative stain EM of Bi-ScFv/ HIV Env trimer complex.** (A) Bi-ScFv, dVRC01-5X-PGT121, in complex with BG505.SOSIP.664 at a ratio of 0.5:1. Left, Raw micrograph; Right, 2D classes of complex. (B) Bi-ScFv, dVRC01-5X-PGT121, in complex with BG505.SOSIP.664 at a ratio of 6:1. Left, Raw micrograph; Right, 2D classes of complex.

**A**

Q769.d22.SG3  
 6095.V1.C10.SG3  
 Q168.a2.SG3  
 BJOX009000.02.4.SG3  
 242-14.SG3  
 T251-18.SG3  
 7165.18.SG3  
 AC10.29.SG3  
 BG1168.01.SG3  
 JRF1.JB.SG3  
 QH0692.42.SG3  
 3637.V5.C3.SG3  
 CAP210.E8.SG3  
 DU172.17.SG3  
 DU422.01.SG3  
 TZA125.17.SG3  
 ZM214.15.SG3  
 ZM249.1.SG3  
 57128.vrc15.SG3  
 X2088.c9.SG3

|     |       |       |       |       |       |       |       |       |       |       |       |       |
|-----|-------|-------|-------|-------|-------|-------|-------|-------|-------|-------|-------|-------|
| A   | 0.480 | 0.735 | 7.83  | 10.1  | 10.4  | 0.765 | 0.461 | 4.76  | 10.2  | 25.0  | 0.050 | >50   |
| ACD | 0.072 | 0.090 | 0.054 | 0.093 | 0.102 | 0.198 | 0.159 | 0.035 | 0.041 | 0.055 | 0.444 | 1.20  |
| AD  | 0.090 | 0.114 | 1.18  | 1.35  | 3.39  | 0.322 | 0.225 | 0.309 | 0.490 | 0.505 | 0.113 | >50   |
| AE  | 0.849 | 1.06  | 0.609 | 1.07  | 1.25  | 2.35  | 1.51  | 0.175 | 0.166 | 0.322 | 3.32  | 7.07  |
| AG  | >50   | >50   | >50   | >50   | >50   | >50   | >50   | >50   | >50   | >50   | >50   | >50   |
| AG  | 42.9  | 25.6  | 28.4  | 24.8  | 47.7  | 41.7  | 30.2  | 13.0  | 25.9  | 41.7  | 8.59  | >50   |
| B   | 0.240 | 0.318 | 0.057 | 0.054 | 0.063 | 0.528 | 0.341 | 0.041 | 0.047 | 0.051 | >50   | 0.024 |
| B   | 0.276 | 0.291 | 0.117 | 0.057 | 0.048 | 0.600 | 0.266 | 0.058 | 0.090 | 0.080 | 2.71  | 0.121 |
| B   | 15.3  | 7.05  | >50   | >50   | >50   | 6.08  | 4.61  | >50   | >50   | >50   | 0.911 | >50   |
| B   | 0.144 | 0.117 | 0.072 | 0.066 | 0.081 | 0.174 | 0.175 | 0.090 | 0.119 | 0.102 | 0.022 | 0.029 |
| B   | 6.09  | 5.67  | 1.22  | 1.12  | 1.44  | 8.02  | 6.67  | 0.872 | 1.08  | 1.61  | 3.82  | 7.01  |
| C   | >50   | >50   | >50   | >50   | >50   | >50   | >50   | >50   | >50   | >50   | 14.9  | >50   |
| C   | 18.3  | 9.15  | 39.9  | 35.4  | >50   | 13.2  | 11.4  | 4.69  | 2.40  | 4.11  | >50   | 48.2  |
| C   | 1.06  | 0.930 | 0.201 | 0.213 | 0.243 | 0.965 | 0.883 | 0.178 | 0.207 | 0.254 | >50   | 0.089 |
| C   | 0.276 | 0.273 | 0.135 | 0.168 | 0.177 | 0.351 | 0.378 | 0.068 | 0.074 | 0.091 | >50   | 0.195 |
| C   | 9.21  | 10.3  | 15.8  | 9.96  | 16.5  | 8.69  | 12.1  | 1.61  | 1.72  | 2.64  | >50   | 14.2  |
| C   | 1.33  | 2.13  | 0.885 | 0.822 | 0.423 | 5.31  | 2.46  | 0.536 | 1.07  | 0.741 | 0.590 | 0.661 |
| C   | 0.654 | 0.675 | 10.4  | 13.5  | 18.9  | 0.923 | 0.844 | 8.55  | 11.1  | >50   | 0.100 | >50   |
| D   | 3.06  | 1.69  | >50   | 31.5  | 45.6  | 2.76  | 2.26  | 0.838 | 0.789 | 1.36  | >50   | 4.74  |
| G   | 0.102 | 0.087 | 0.015 | 0.036 | 0.036 | 0.186 | 0.077 | 0.016 | 0.015 | 0.031 | >50   | 0.002 |

**B**

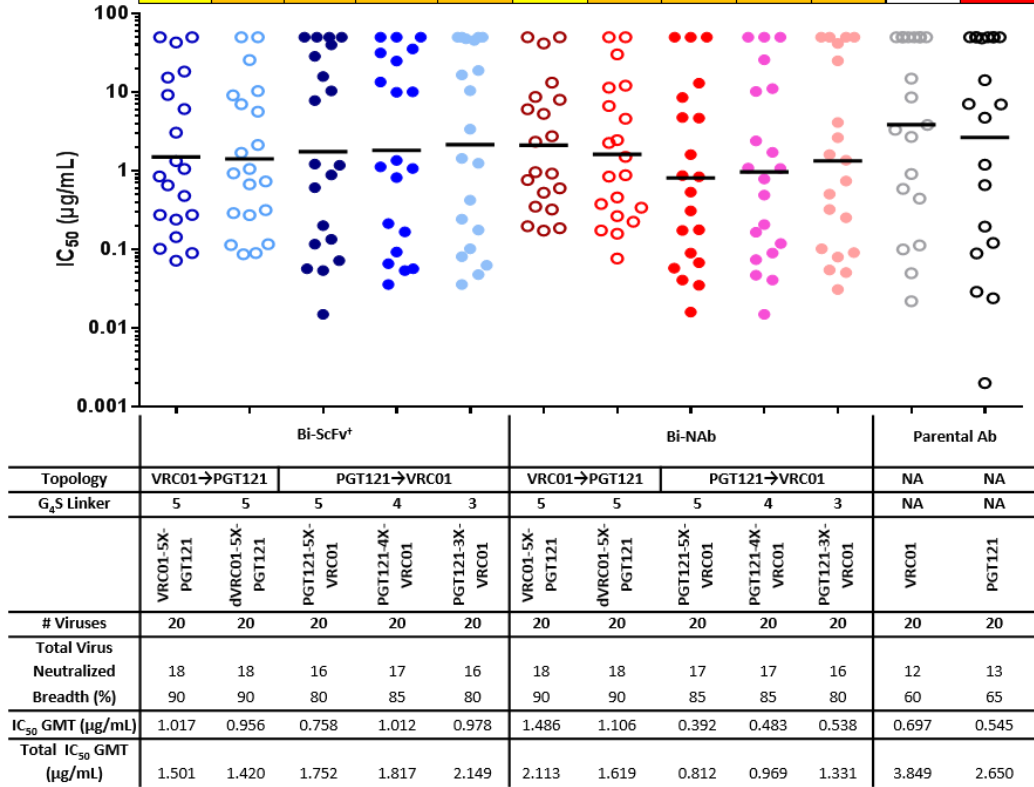

**C**

| Virus ID        | clade | dVRC01-5X-PGT121 |       |        |              |
|-----------------|-------|------------------|-------|--------|--------------|
|                 |       | Bi-Nab           | VRC01 | PGT121 | VRC01+PGT121 |
| T250-4          | AG    | 0.051            | >25   | 0.013  | 0.091        |
| BJOX002000.03.2 | BC    | 0.275            | >25   | 0.133  | 0.684        |
| DU172.17        | C     | 0.406            | >25   | 0.422  | 1.83         |
| DU422.01        | C     | 0.426            | >25   | 0.136  | 0.839        |
| TV1.29          | C     | 0.814            | >25   | 0.266  | 1.76         |
| TZA125.17       | C     | 4.84             | >25   | 15.6   | >50          |
| 57128.vrc15     | D     | 0.985            | >25   | 2.99   | 12.4         |
| X2088.c9        | G     | 0.081            | >25   | 0.018  | 0.131        |
| 6631.V3.C10     | C     | 18.0             | >25   | >25    | >50          |
| CAP210.E8       | C     | 14.7             | >25   | >25    | >50          |
| 3817.v2.c59     | CD    | 48.5             | >25   | >25    | >50          |

**D**

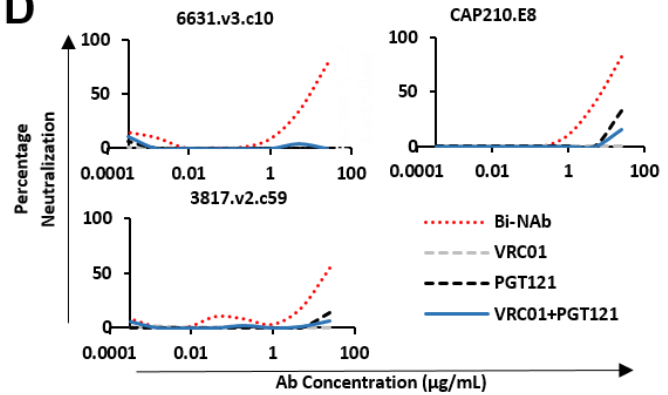

**Supplementary Figure 3. Neutralization profile of bispecific antibodies tested with a 20-virus panel.** (A) Summary of IC<sub>50</sub> (µg/ml) for bispecific antibodies tested in 20 virus panel. (B) Scatter plots of IC<sub>50</sub> titers in which each virus is represented by an individual circle. († indicates that the IC<sub>50</sub> was adjusted by a factor of 3 to account for the molarity difference between the lower molecular weight Bi-ScFv and the IgG and Bi-NAb). (C) Summary of IC<sub>50</sub> titers (µg/ml) against VRC01- and dual-resistant viruses that are sensitive to the Bi-NAb in a confirmatory experiment, with individual parental bNAb and a cocktail of parental bNAb (VRC01+PGT121) as control. (D) Raw neutralization curves of dual resistant viruses sensitive to the Bi-NAb in (C).

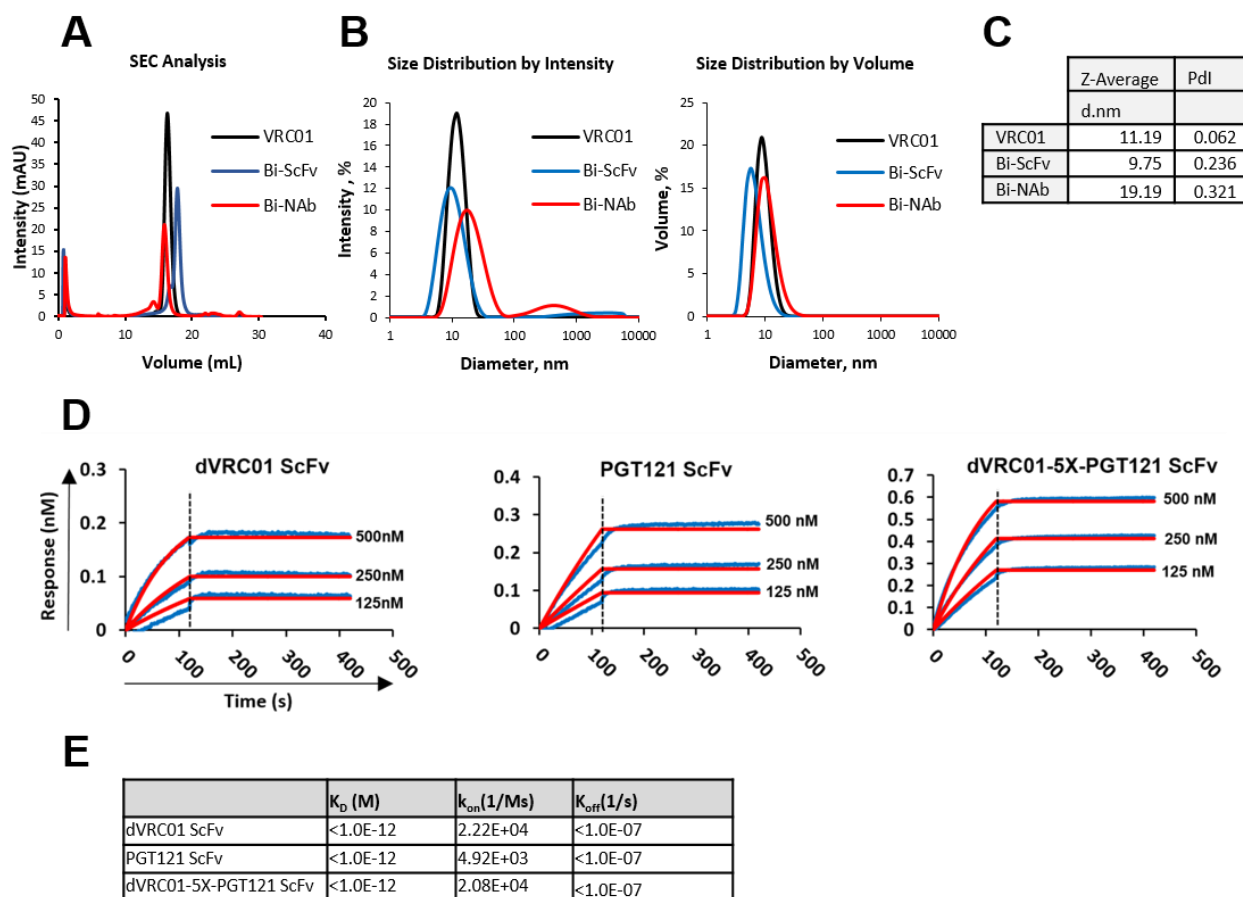

**Supplementary Figure 4. Biochemical properties of dVRC01-5X-PGT121 Bi-ScFv and Bi-NAb.** (A) Analytical size exclusion chromatography profiles of Bi-ScFv and Bi-NAb, with VRC01 as a control. (B) Dynamic light scattering (DLS) profiles of Bi-ScFv and Bi-NAb. (C) DLS parameters of Bi-ScFv and Bi-NAb, with VRC01 as control. PdI, polydispersity index. (D) BLI curves of ScFv binding to biotinylated BG505 SOSIP.664. Streptavidin biosensors were loaded with biotinylated BG505 SOSIP.664 followed by determination of association and dissociation rates for respective antibodies using concentrations of scFvs at 500 nM (top curve), 250 nM (middle curve) and 125 nM (lower curve). (E)  $K_D$ ,  $k_{on}$ ,  $k_{off}$  values for dVRC01 ScFv, PGT121 ScFv and dVRC01-5X-PGT121 ScFv binding to BG505 SOSIP.664 trimer.

# Supplementary Figure 5

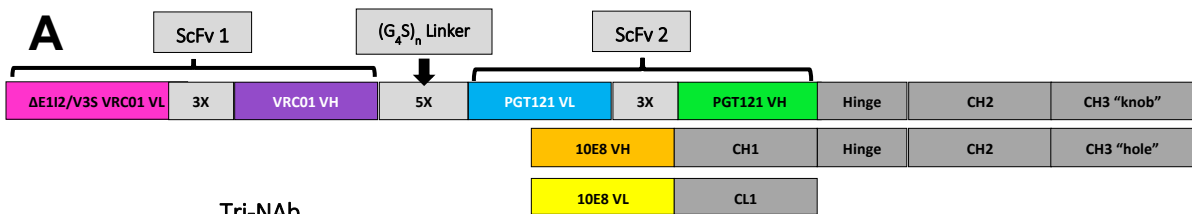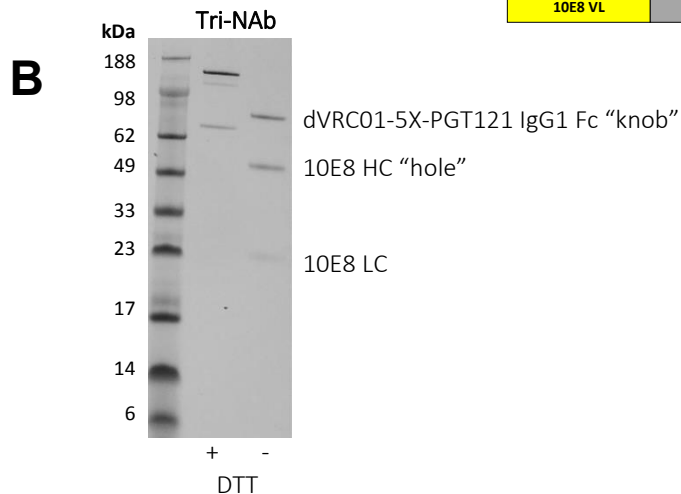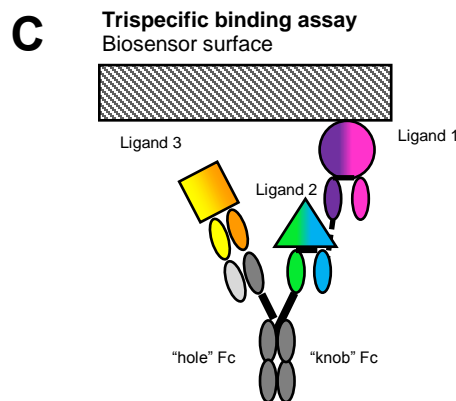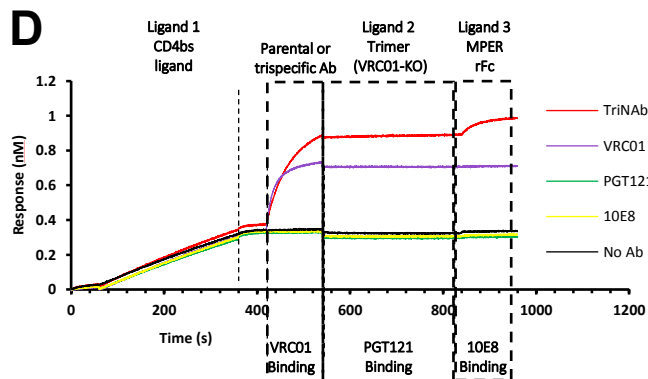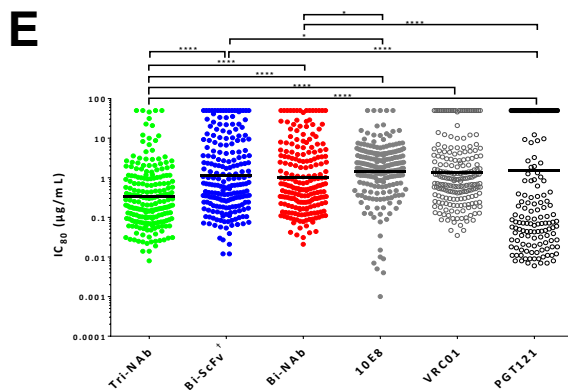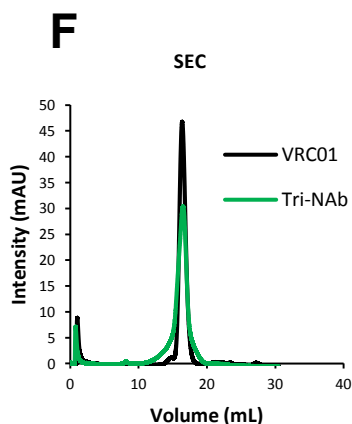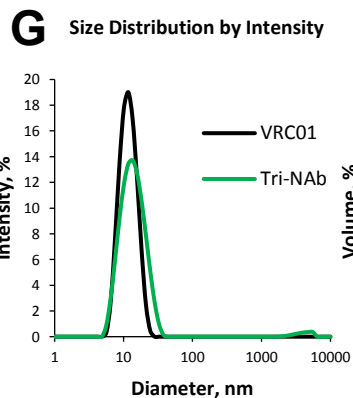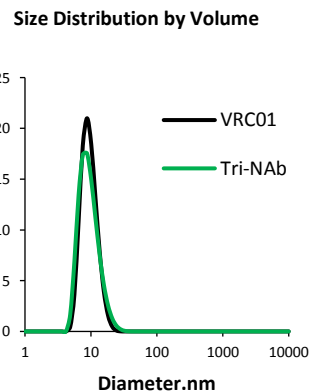

**H**

|         | Z-Average<br>d.nm | PdI   |
|---------|-------------------|-------|
| VRC01   | 11.19             | 0.062 |
| Tri-NAb | 12.82             | 0.173 |

**Supplementary Figure 5. Tri-NAb construct, expression, and characterization.** (A) Tri-NAb constructs scheme. (B) Reduced (left lane) and non-reduced (right lane) SDS-PAGE analysis of trispecific antibody. (C) Scheme of the trispecific binding assay via biolayer interferometry (BLI). (D) BLI curves of trispecific binding assay. OCTET biosensors were loaded with ligand 1 (biotinylated RSC3) specific for VRC01 epitope (CD4bs), followed by trispecific antibody, ligand 2 (BG505 SOSIP.664\_D368R) specific for PGT121 epitope (V3 glycan), and ligand 3 (MPER rFc) specific for 10E8 epitope (MPER). Parental IgGs were used as control. (E) Scatter plots of IC<sub>80</sub> titers in which each virus is represented by an individual circle (Statistical differences in neutralization were evaluated using non-parametric t test (Wilcoxon matched-pairs signed rank test) with \*p<0.05, \*\*p<0.01, \*\*\*p<0.001, \*\*\*\*p<0.0001). († indicates that the IC<sub>80</sub> titer was adjusted by a factor of 3 to account for the molarity difference between the lower molecular weight Bi-ScFv and the IgG, Bi-NAb and Tri-NAb). (F) Analytical size exclusion chromatography profile of Tri-NAb with VRC01 as control. (G) Dynamic light scattering (DLS) profiles, and (H) DLS parameters of Tri-NAb with VRC01 as control.



## Supplementary Figure 6

| Virus ID        | Clade | Tri-NAb | Bi-ScFv | Bi-NAb | 10E8   | VRC01 | PGT121 |
|-----------------|-------|---------|---------|--------|--------|-------|--------|
| 0260.v5.c36     | A     | 0.170   | 0.124   | 0.416  | 9.87   | 0.523 | 0.039  |
| 0330.v4.c3      | A     | 0.092   | 0.082   | 0.241  | 1.12   | 0.066 | 0.041  |
| 0439.v5.c1      | A     | 0.471   | 1.57    | 2.93   | 1.23   | 0.228 | >50    |
| 3365.v2.c20     | A     | 0.078   | 0.070   | 0.232  | 1.60   | 0.060 | 0.059  |
| 3415.v1.c1      | A     | 0.312   | 0.354   | 0.847  | 4.69   | 0.087 | >50    |
| 3718.v3.c11     | A     | 0.147   | 0.116   | 0.295  | 0.838  | 0.411 | 1.40   |
| 398-F1_F6_20    | A     | 0.005   | 0.015   | 0.147  | 0.704  | 0.102 | 0.002  |
| BB201.B42       | A     | 0.049   | 0.015   | 0.063  | 0.613  | 0.262 | 0.003  |
| BB539.2B13      | A     | 0.296   | 1.82    | 1.29   | 0.591  | 0.105 | >50    |
| BG505.W6M.C2    | A     | 0.089   | 0.048   | 0.134  | 0.689  | 0.037 | 0.032  |
| BI369.9A        | A     | 0.072   | 0.087   | 0.103  | 0.356  | 0.047 | 0.008  |
| BS208.B1        | A     | 0.026   | 0.061   | 0.096  | 0.319  | 0.027 | >50    |
| KER2008.12      | A     | 0.131   | 0.067   | 0.233  | >50    | 0.487 | 2.22   |
| KER2018.11      | A     | 0.211   | 0.064   | 0.271  | 1.89   | 0.348 | >50    |
| KNH1209.18      | A     | 0.034   | 0.014   | 0.049  | 0.406  | 0.119 | 0.002  |
| MB201.A1        | A     | 0.030   | 0.008   | 0.035  | 0.411  | 0.241 | 0.005  |
| MB539.2B7       | A     | 0.772   | 1.94    | 4.16   | >50    | 0.512 | >50    |
| MI369.A5        | A     | 0.107   | 0.056   | 0.155  | 0.671  | 0.236 | 0.022  |
| MS208.A1        | A     | 0.405   | 0.504   | 0.994  | 0.187  | 0.174 | >50    |
| Q23.17          | A     | 0.038   | 0.060   | 0.131  | 0.461  | 0.099 | 0.004  |
| Q259.17         | A     | 0.042   | 0.013   | 0.043  | 4.76   | 0.085 | >50    |
| Q769.d22        | A     | 0.315   | 0.175   | 0.489  | 1.91   | 0.036 | >50    |
| Q769.h5         | A     | 0.229   | 0.094   | 0.325  | 2.89   | 0.072 | >50    |
| Q842.d12        | A     | 0.048   | 0.030   | 0.139  | 2.82   | 0.034 | 0.016  |
| QH209.14M.A2    | A     | 0.168   | 0.175   | 0.456  | 1.30   | 0.026 | >50    |
| RW020.2         | A     | 0.021   | 0.006   | 0.032  | 0.902  | 0.217 | 0.002  |
| UG037.8         | A     | 0.092   | 0.104   | 0.333  | 0.048  | 0.073 | 0.065  |
| 246-F3.C10.2    | AC    | 0.037   | 0.028   | 0.092  | 0.210  | 0.254 | >50    |
| 3301.V1.C24     | AC    | 0.070   | 0.029   | 0.085  | 2.97   | 0.095 | 0.009  |
| 3589.V1.C4      | AC    | 0.208   | 0.127   | 0.475  | 5.77   | 0.081 | >50    |
| 6540.v4.c1      | AC    | 28.7    | >50     | >50    | 2.24   | >50   | >50    |
| 6545.V4.C1      | AC    | 5.56    | >50     | >50    | 2.54   | >50   | >50    |
| 0815.V3.C3      | ACD   | 0.058   | 0.031   | 0.109  | 0.491  | 0.029 | 0.020  |
| 6095.V1.C10     | ACD   | 0.012   | 0.146   | 0.331  | 0.0005 | 0.631 | 37.3   |
| 3468.V1.C12     | AD    | 0.025   | 0.015   | 0.045  | 0.381  | 0.058 | 0.042  |
| Q168.a2         | AD    | 0.136   | 0.067   | 0.141  | 0.463  | 0.101 | >50    |
| Q461.e2         | AD    | 4.41    | 3.28    | 6.73   | 2.29   | 0.420 | >50    |
| 620345.c1       | AE    | 26.3    | >50     | >50    | 0.989  | >50   | >50    |
| BJOX009000.02.4 | AE    | 0.043   | 0.228   | 0.654  | 0.251  | 1.74  | 14.7   |
| BJOX010000.06.2 | AE    | 0.177   | 4.85    | 18.8   | 0.060  | 8.40  | >50    |
| BJOX025000.01.1 | AE    | 0.357   | >50     | >50    | 0.228  | 20.2  | >50    |
| BJOX028000.10.3 | AE    | 0.076   | 0.152   | 0.285  | 0.167  | 0.188 | >50    |
| C1080.c3        | AE    | 0.077   | 6.87    | 5.02   | 0.108  | 2.63  | >50    |
| C2101.c1        | AE    | 0.138   | 1.47    | 1.86   | 1.20   | 0.269 | >50    |
| C3347.c11       | AE    | 0.005   | 1.77    | 1.73   | 0.019  | 0.213 | >50    |
| C4118.09        | AE    | 0.113   | 2.00    | 2.26   | 0.421  | 0.285 | >50    |
| CM244.ec1       | AE    | 0.117   | 0.237   | 0.867  | 0.365  | 0.116 | >50    |
| CNE3            | AE    | 3.85    | >50     | >50    | 1.37   | 1.79  | >50    |
| CNE5            | AE    | 0.183   | 1.01    | 4.59   | 1.17   | 0.398 | >50    |
| CNE55           | AE    | 0.233   | 1.78    | 5.74   | 0.038  | 0.358 | >50    |
| CNE56           | AE    | 0.476   | 2.74    | 6.54   | 0.060  | 0.525 | >50    |
| CNE59           | AE    | 0.065   | 2.83    | 2.26   | 0.001  | 0.368 | >50    |
| CNE8            | AE    | 0.005   | 0.356   | 1.14   | 0.140  | 0.299 | >50    |
| M02138          | AE    | 0.031   | 4.92    | 7.18   | 0.014  | 0.898 | >50    |
| R1166.c1        | AE    | 0.035   | 4.58    | 10.6   | 0.488  | 2.09  | >50    |
| R2184.c4        | AE    | 0.557   | 0.791   | 2.33   | 0.576  | 0.106 | >50    |
| R3265.c6        | AE    | 0.894   | 2.87    | 6.81   | 1.58   | 0.382 | >50    |
| TH023.6         | AE    | 0.015   | 5.07    | 1.05   | 0.0003 | 0.546 | >50    |
| TH966.8         | AE    | 0.027   | 2.29    | 3.47   | 0.039  | 0.390 | >50    |
| TH976.17        | AE    | 0.256   | 1.05    | 2.96   | 0.392  | 0.299 | >50    |
| 235-47          | AG    | 0.067   | 0.071   | 0.246  | 0.244  | 0.043 | 0.110  |
| 242-14          | AG    | 1.23    | 33.2    | >50    | 0.568  | >50   | >50    |
| 263-8           | AG    | 0.227   | 0.250   | 0.683  | 0.229  | 0.176 | 1.23   |
| 269-12          | AG    | 0.083   | 0.056   | 0.239  | 0.124  | 0.313 | 0.164  |
| 271-11          | AG    | 0.020   | 0.008   | 0.032  | 0.891  | 0.059 | 11.7   |
| 928-28          | AG    | 0.088   | 1.16    | 2.63   | 0.079  | 0.394 | 31.0   |
| DJ263.8         | AG    | 0.006   | 0.016   | 0.100  | 0.009  | 0.047 | 0.064  |
| T250-4          | AG    | 0.025   | 0.007   | 0.028  | 1.07   | >50   | 0.001  |
| T251-18         | AG    | 0.052   | 2.86    | 8.32   | 0.666  | 4.21  | 10.8   |

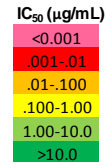

## Supplementary Figure 6

| Virus ID        | Clade | Tri-NAb | Bi-ScFv | Bi-NAb | 10E8   | VRC01 | PGT121 |
|-----------------|-------|---------|---------|--------|--------|-------|--------|
| T253-11         | AG    | 0.239   | 0.217   | 2.29   | 1.21   | 0.397 | >50    |
| T255-34         | AG    | 0.013   | 0.034   | 0.089  | 0.228  | 0.500 | >50    |
| T257-31         | AG    | 0.247   | 0.480   | 1.71   | 0.336  | 1.72  | >50    |
| T266-60         | AG    | 0.684   | 0.534   | 1.40   | >50    | 1.81  | 0.160  |
| T278-50         | AG    | 2.36    | >50     | >50    | 0.357  | >50   | >50    |
| T280-5          | AG    | 0.024   | 0.014   | 0.050  | 0.715  | 0.032 | 0.002  |
| T33-7           | AG    | 0.105   | 0.088   | 0.180  | 0.818  | 0.018 | >50    |
| 3988.25         | B     | 0.033   | 0.021   | 0.058  | 0.070  | 0.494 | 0.002  |
| 5768.04         | B     | 0.124   | 0.042   | 0.108  | 1.63   | 0.365 | 0.039  |
| 6101.10         | B     | 0.010   | 0.018   | 0.036  | 0.0010 | 0.035 | 0.002  |
| 6535.3          | B     | 0.007   | 0.006   | 0.031  | 0.190  | 1.93  | 0.003  |
| 7165.18         | B     | 0.055   | 0.085   | 0.196  | 0.659  | 28.2  | 0.019  |
| 45_01dG5        | B     | 0.015   | 0.008   | 0.051  | 0.106  | 0.018 | 0.002  |
| 89.6.DG         | B     | 0.007   | 0.124   | 0.160  | 0.318  | 0.762 | 0.016  |
| AC10.29         | B     | 0.128   | 0.179   | 0.534  | 0.102  | 1.81  | 0.028  |
| ADA.DG          | B     | 0.022   | 0.075   | 0.193  | 0.055  | 0.470 | 0.002  |
| Ba1.01          | B     | 0.031   | 0.007   | 0.028  | 0.421  | 0.095 | 0.011  |
| BaL26           | B     | 0.036   | 0.023   | 0.060  | 0.518  | 0.042 | 0.010  |
| BG1168.01       | B     | 0.580   | 2.03    | 2.27   | 0.396  | 0.869 | >50    |
| BL01.DG         | B     | 4.01    | >50     | >50    | 0.362  | >50   | >50    |
| BR07.DG         | B     | 0.031   | 0.162   | 0.338  | 0.118  | 1.57  | 0.064  |
| BX08.16         | B     | 0.020   | 0.059   | 0.052  | 0.213  | 0.274 | 0.002  |
| CAAN.A2         | B     | 0.058   | 0.052   | 0.104  | 1.45   | 1.03  | 0.005  |
| CNE10           | B     | 0.018   | 0.024   | 0.090  | 0.014  | 0.565 | 0.005  |
| CNE12           | B     | 0.021   | 0.023   | 0.073  | 0.301  | 0.866 | 0.002  |
| CNE14           | B     | 0.018   | 0.012   | 0.048  | 0.151  | 0.275 | 0.002  |
| CNE4            | B     | 0.063   | 0.353   | 0.966  | 0.059  | 0.910 | 11.5   |
| CNE57           | B     | 0.029   | 0.050   | 0.155  | 0.059  | 0.563 | 0.008  |
| HO86.8          | B     | 5.94    | >50     | >50    | 0.326  | >50   | >50    |
| HT593.1         | B     | 0.094   | 0.445   | 1.10   | 0.049  | 0.476 | >50    |
| HXB2.DG         | B     | 0.008   | 0.003   | 0.065  | 0.003  | 0.034 | >50    |
| JRC5F.JB        | B     | 0.158   | 0.036   | 0.278  | 0.429  | 0.362 | 0.061  |
| JRFL.JB         | B     | 0.053   | 0.021   | 0.087  | 0.174  | 0.028 | 0.017  |
| MN.3            | B     | 0.006   | 0.009   | 0.057  | 0.0003 | 0.020 | >50    |
| PVO.04          | B     | 0.732   | 0.497   | 1.28   | 1.60   | 0.511 | 0.132  |
| QH0515.01       | B     | 0.535   | 0.462   | 1.29   | 2.25   | 1.01  | 8.70   |
| QH0692.42       | B     | 0.331   | 0.966   | 1.70   | 0.531  | 1.54  | 0.940  |
| REJO.67         | B     | 0.072   | 0.046   | 0.178  | 0.302  | 0.075 | 8.87   |
| RHPA.7          | B     | 0.065   | 0.035   | 0.110  | 1.01   | 0.034 | 0.014  |
| SC422.8         | B     | 0.166   | 0.167   | 0.488  | 0.343  | 0.127 | 0.098  |
| SF162.LS        | B     | 0.010   | 0.0006  | 0.017  | 0.245  | 0.207 | 0.004  |
| SS1196.01       | B     | 0.002   | 0.017   | 0.063  | 0.244  | 0.304 | 0.002  |
| THRO.18         | B     | 0.316   | 1.70    | 2.60   | 0.092  | 3.16  | >50    |
| TRJO.58         | B     | 0.377   | 0.321   | 0.820  | 1.13   | 0.101 | 4.31   |
| TRO.11          | B     | 0.033   | 0.033   | 0.138  | 0.028  | 0.469 | 0.006  |
| WITO.33         | B     | 0.086   | 0.298   | 0.893  | 0.031  | 0.102 | 0.787  |
| X2278.C2.B6     | B     | 0.051   | 0.064   | 0.188  | 0.442  | 0.151 | 0.007  |
| YU2.DG          | B     | 0.049   | 0.047   | 0.200  | 1.17   | 0.076 | 0.068  |
| BJOX002000.03.2 | BC    | 0.066   | 0.048   | 0.132  | 0.384  | >50   | 0.018  |
| CH038.12        | BC    | 0.024   | 0.043   | 0.104  | 0.271  | 0.447 | 0.004  |
| CH070.1         | BC    | 0.002   | 0.039   | 0.096  | 6.65   | 14.0  | 0.003  |
| CH117.4         | BC    | 0.018   | 0.008   | 0.059  | 0.270  | 0.105 | >50    |
| CH119.10        | BC    | 0.023   | 0.070   | 0.173  | 0.591  | 0.833 | 0.029  |
| CH181.12        | BC    | 0.063   | 0.048   | 0.124  | 0.754  | 0.487 | 0.007  |
| CNE15           | BC    | 0.009   | 0.105   | 0.359  | 0.844  | 0.141 | 19.0   |
| CNE19           | BC    | 0.007   | 0.002   | 0.020  | 0.251  | 0.247 | 0.007  |
| CNE20           | BC    | 0.018   | 0.002   | 0.017  | 0.131  | 7.39  | 0.002  |
| CNE21           | BC    | 0.031   | 0.026   | 0.098  | 0.979  | 0.274 | 0.004  |
| CNE40           | BC    | 0.005   | 0.234   | 0.440  | 0.0010 | 0.433 | 0.224  |
| CNE7            | BC    | 0.033   | 0.055   | 0.175  | 0.130  | 0.187 | 0.032  |
| 286.36          | C     | 0.009   | 0.005   | 0.037  | 1.19   | 0.223 | 0.002  |
| 288.38          | C     | 0.007   | 0.030   | 0.085  | 0.435  | 1.38  | 0.006  |
| 0013095-2.11    | C     | 0.004   | 0.306   | 0.864  | 0.009  | 0.086 | >50    |
| 001428-2.42     | C     | 0.038   | 0.018   | 0.085  | 1.71   | 0.014 | 0.023  |
| 0077_V1.C16     | C     | 0.171   | 0.224   | 0.482  | 1.86   | 1.13  | >50    |
| 00836-2.5       | C     | 0.024   | 0.005   | 0.047  | 0.666  | 0.122 | 31.8   |
| 0921.V2.C14     | C     | 0.093   | 0.050   | 0.135  | 0.908  | 0.230 | >50    |
| 16055-2.3       | C     | 0.047   | 0.016   | 0.070  | 1.10   | 0.100 | 1.02   |
| 16845-2.22      | C     | 0.068   | 2.99    | 5.21   | 0.020  | 2.95  | 9.41   |

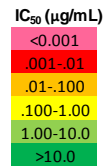

## Supplementary Figure 6

| Virus ID       | Clade | Tri-NAb | Bi-ScFv | Bi-NAb | 10E8   | VRC01 | PGT121 |
|----------------|-------|---------|---------|--------|--------|-------|--------|
| 16936-2.21     | C     | 0.003   | 0.011   | 0.038  | 0.264  | 0.154 | 0.003  |
| 25710-2.43     | C     | 0.037   | 0.034   | 0.154  | 0.064  | 0.487 | 0.014  |
| 25711-2.4      | C     | 0.063   | 0.028   | 0.103  | 0.516  | 0.559 | 0.010  |
| 25925-2.22     | C     | 0.072   | 0.060   | 0.188  | 0.402  | 0.550 | 0.024  |
| 26191-2.48     | C     | 0.136   | 0.107   | 0.406  | 1.83   | 0.183 | 0.150  |
| 3168.V4.C10    | C     | 0.544   | 0.638   | 1.68   | 2.83   | 0.129 | 0.485  |
| 3637.V5.C3     | C     | 2.07    | 11.4    | 18.9   | 2.12   | 1.97  | >50    |
| 3873.V1.C24    | C     | 0.007   | 0.322   | 1.48   | 5.51   | 2.81  | 0.015  |
| 426c           | C     | 0.429   | 0.419   | 0.953  | 0.445  | 1.93  | >50    |
| 6322.V4.C1     | C     | 1.67    | 15.2    | 5.00   | 0.923  | >50   | >50    |
| 6471.V1.C16    | C     | >50     | >50     | >50    | 4.98   | >50   | >50    |
| 6631.V3.C10    | C     | 1.39    | 1.91    | 2.63   | 0.934  | >50   | >50    |
| 6644.V2.C33    | C     | 0.027   | 0.021   | 0.143  | 0.013  | 0.153 | 0.018  |
| 6785.V5.C14    | C     | 0.134   | 0.059   | 0.149  | 0.701  | 0.253 | 0.019  |
| 6838.V1.C35    | C     | 0.012   | 0.002   | 0.015  | 0.292  | 0.288 | 0.119  |
| 96ZM651.02     | C     | 0.011   | 0.026   | 0.070  | 0.033  | 0.807 | 0.009  |
| BRO25.9        | C     | 0.014   | 0.019   | 0.033  | 0.307  | 0.528 | 0.002  |
| CAP210.E8      | C     | 0.526   | 2.55    | 4.88   | 0.474  | >50   | >50    |
| CAP244.D3      | C     | 0.015   | 0.455   | 1.28   | 0.369  | 1.34  | >50    |
| CAP256.206.C9  | C     | 0.049   | 0.054   | 0.102  | 0.713  | 1.07  | 0.010  |
| CAP45.G3       | C     | 0.168   | 0.166   | 0.373  | 0.722  | 6.75  | 2.08   |
| Ce1176.A3      | C     | 0.071   | 0.051   | 0.120  | 0.252  | 1.85  | 0.016  |
| CE703010217.B6 | C     | 0.018   | 0.009   | 0.038  | 0.096  | 0.195 | 0.002  |
| CNE30          | C     | 0.094   | 0.224   | 0.609  | 0.456  | 0.693 | 0.061  |
| CNE31          | C     | 1.01    | 0.713   | 2.30   | 1.32   | 0.772 | 0.789  |
| CNE53          | C     | 0.010   | 0.050   | 0.106  | 0.213  | 0.112 | 0.022  |
| CNE58          | C     | 0.366   | 0.970   | 2.32   | 0.229  | 0.252 | >50    |
| DU123.06       | C     | 0.002   | 0.053   | 0.199  | 0.132  | 5.70  | 0.033  |
| DU151.02       | C     | 0.059   | 0.011   | 0.044  | 0.461  | 10.5  | 0.005  |
| DU156.12       | C     | 0.015   | 0.005   | 0.036  | 0.023  | 0.077 | 0.005  |
| DU172.17       | C     | 0.039   | 0.059   | 0.140  | 0.057  | >50   | 0.104  |
| DU422.01       | C     | 0.182   | 0.057   | 0.187  | 0.224  | >50   | 0.164  |
| MW965.26       | C     | 0.005   | 0.012   | 0.051  | 0.0010 | 0.043 | 0.011  |
| SO18.18        | C     | 0.0010  | 0.004   | 0.023  | 1.60   | 0.052 | 0.002  |
| TV1.29         | C     | 1.17    | 0.319   | 0.473  | 0.248  | >50   | 0.118  |
| TZA125.17      | C     | 0.428   | 2.11    | 5.14   | 0.217  | >50   | 9.96   |
| TZBD.02        | C     | 0.017   | 0.007   | 0.035  | 1.41   | 0.043 | 0.005  |
| ZA012.29       | C     | 0.060   | 0.023   | 0.062  | 1.47   | 0.327 | 0.005  |
| ZM106.9        | C     | 0.049   | 0.023   | 0.089  | >50    | 0.264 | 0.005  |
| ZM109.4        | C     | 0.060   | 0.091   | 0.351  | 0.161  | 0.142 | 13.7   |
| ZM135.10a      | C     | 0.004   | 1.20    | 2.12   | 0.033  | 1.40  | 1.50   |
| ZM176.66       | C     | 0.030   | 0.071   | 0.221  | 0.267  | 0.045 | 13.8   |
| ZM197.7        | C     | 0.161   | 1.14    | 4.15   | 0.055  | 0.532 | >50    |
| ZM214.15       | C     | 0.533   | 0.857   | 2.30   | 2.22   | 0.957 | 0.682  |
| ZM215.8        | C     | 0.023   | 0.021   | 0.100  | 0.044  | 0.362 | 0.014  |
| ZM233.6        | C     | 0.090   | 0.070   | 0.268  | 0.270  | 1.98  | 4.14   |
| ZM249.1        | C     | 0.279   | 0.486   | 0.810  | 0.830  | 0.107 | >50    |
| ZM53.12        | C     | 0.011   | 0.0008  | 0.010  | 2.62   | 0.702 | 0.002  |
| ZM55.28a       | C     | 0.212   | 0.137   | 0.407  | 2.34   | 0.241 | 0.070  |
| 3326.V4.C3     | CD    | 0.018   | 0.008   | 0.017  | 1.40   | 0.107 | >50    |
| 3337.V2.C6     | CD    | 0.039   | 0.051   | 0.110  | 1.09   | 0.105 | 21.1   |
| 3817.v2.c59    | CD    | 0.230   | 7.23    | 11.6   | 0.229  | >50   | >50    |
| 191821.E6.1    | D     | 0.921   | 0.487   | 1.57   | 1.91   | 0.438 | >50    |
| 231965.c1      | D     | 0.261   | 1.31    | 1.41   | 11.0   | 0.392 | >50    |
| 247-23         | D     | 0.639   | 19.5    | 18.3   | 0.344  | 1.63  | >50    |
| 3016.v5.c45    | D     | 0.037   | 0.043   | 0.078  | 0.710  | 0.117 | >50    |
| 57128.vrc15    | D     | 0.098   | 0.438   | 0.875  | 0.212  | >50   | 2.16   |
| 6405.v4.c34    | D     | 0.103   | 0.092   | 0.259  | 0.461  | 1.69  | 0.019  |
| A03349M1.vrc4a | D     | 0.189   | 0.071   | 0.194  | 0.270  | 4.42  | 0.013  |
| A07412M1.vrc12 | D     | 0.041   | 0.011   | 0.057  | 0.140  | 0.101 | 0.012  |
| NKU3006.ec1    | D     | 1.91    | 3.28    | 8.54   | 0.673  | 0.460 | >50    |
| UG021.16       | D     | 0.016   | 0.275   | 0.340  | 0.046  | 0.451 | 2.41   |
| UG024.2        | D     | 0.035   | 2.28    | 0.830  | 0.053  | 0.219 | >50    |
| P0402.c2.11    | G     | 0.0010  | 0.024   | 0.081  | 0.057  | 0.207 | 0.004  |
| P1981.C5.3     | G     | 0.025   | 0.006   | 0.024  | 0.024  | 0.336 | 0.004  |
| X1193.c1       | G     | 0.009   | 0.128   | 0.239  | 0.341  | 0.124 | 0.028  |
| X1254.c3       | G     | 0.010   | 0.072   | 0.188  | 3.67   | 0.055 | 0.024  |
| X1632.S2.B10   | G     | 0.065   | 0.088   | 0.178  | 0.387  | 0.131 | >50    |
| X2088.c9       | G     | 0.017   | 0.016   | 0.029  | >50    | >50   | 0.003  |

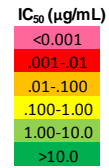

## Supplementary Figure 6

| Virus ID         | Clade | Tri-NAb | Bi-ScFv | Bi-NAb | 10E8  | VRC01 | PGT121 |
|------------------|-------|---------|---------|--------|-------|-------|--------|
| X2131.C1.B5      | G     | 0.016   | 0.023   | 0.079  | 0.039 | 0.467 | 0.010  |
| SIVmac251.30.SG3 | NA    | >50     | >50     | >50    | >50   | >50   | >50    |
| SVA.MLV          | NA    | >50     | >50     | >50    | >50   | >50   | >50    |

|                                | Tri-NAb | Bi-ScFv | Bi-NAb | 10E8  | VRC01 | PGT121 |
|--------------------------------|---------|---------|--------|-------|-------|--------|
| # Viruses                      | 208     | 208     | 208    | 208   | 208   | 208    |
| <b>Total Virus Neutralized</b> |         |         |        |       |       |        |
| IC50 <50 (µg/mL)               | 207     | 199     | 198    | 203   | 188   | 133    |
| IC50 <10 (µg/mL)               | 205     | 195     | 193    | 202   | 184   | 122    |
| IC50 <1.0 (µg/mL)              | 192     | 162     | 147    | 152   | 152   | 108    |
| IC50 <0.1 (µg/mL)              | 131     | 112     | 58     | 42    | 40    | 93     |
| IC50 <0.01 (µg/mL)             | 24      | 23      | 0      | 10    | 0     | 47     |
| <b>% Virus Neutralized</b>     |         |         |        |       |       |        |
| IC50 <50 (µg/mL)               | 99.5    | 95.7    | 95.2   | 97.6  | 90.4  | 63.9   |
| IC50 <10 (µg/mL)               | 98.6    | 93.8    | 92.8   | 97.1  | 88.5  | 58.7   |
| IC50 <1.0 (µg/mL)              | 92.3    | 77.9    | 70.7   | 73.1  | 73.1  | 51.9   |
| IC50 <0.1 (µg/mL)              | 63.0    | 53.8    | 27.9   | 20.2  | 19.2  | 44.7   |
| IC50 <0.01 (µg/mL)             | 11.5    | 11.1    | 0.0    | 4.8   | 0.0   | 22.6   |
| Median IC50 (µg/mL)            | 0.063   | 0.071   | 0.198  | 0.039 | 0.287 | 0.019  |
| Geometric Mean (µg/mL)         | 0.069   | 0.108   | 0.297  | 0.039 | 0.301 | 0.045  |

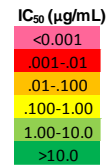

**Supplementary Figure 6. Summary of IC<sub>50</sub> (µg/ml) for trispesific and bispecific antibodies tested in 208 virus panel.**

### Supplementary Figure 7

|                 |     | Tri-NAb | Bi-ScFv | Bi-NAb | 10E8  | VRC01 | PGT121 |
|-----------------|-----|---------|---------|--------|-------|-------|--------|
| 0260.v5.c36     | A   | 0.716   | 0.378   | 0.958  | 21.7  | 1.35  | 0.143  |
| 0330.v4.c3      | A   | 0.403   | 0.216   | 0.619  | 3.64  | 0.202 | 0.194  |
| 0439.v5.c1      | A   | 2.27    | 2.60    | 7.07   | 3.95  | 0.438 | >50    |
| 3365.v2.c20     | A   | 0.301   | 0.150   | 0.534  | 4.56  | 0.125 | 1.34   |
| 3415.v1.c1      | A   | 1.40    | 0.752   | 2.18   | 11.5  | 0.177 | >50    |
| 3718.v3.c11     | A   | 0.573   | 0.337   | 0.685  | 4.42  | 5.58  | 8.64   |
| 398-F1_F6_20    | A   | 0.027   | 0.049   | 0.322  | 6.17  | 0.479 | 0.011  |
| BB201.B42       | A   | 0.161   | 0.053   | 0.137  | 1.96  | 0.614 | 0.011  |
| BB539.2B13      | A   | 1.97    | 3.17    | 3.46   | 13.0  | 0.407 | >50    |
| BG505.W6M.C2    | A   | 0.293   | 0.130   | 0.338  | 2.14  | 0.125 | 0.256  |
| B1369.9A        | A   | 0.340   | 0.418   | 0.563  | 1.29  | 0.532 | 0.043  |
| BS208.B1        | A   | 0.114   | 0.139   | 0.245  | 3.27  | 0.080 | >50    |
| KER2008.12      | A   | 0.421   | 0.221   | 0.673  | >50   | 1.46  | >50    |
| KER2018.11      | A   | 0.979   | 0.213   | 0.800  | 7.16  | 0.976 | >50    |
| KNH1209.18      | A   | 0.101   | 0.037   | 0.110  | 2.39  | 0.298 | 0.007  |
| MB201.A1        | A   | 0.077   | 0.025   | 0.089  | 1.36  | 0.452 | 0.026  |
| MB539.2B7       | A   | 2.45    | 4.72    | 11.0   | >50   | 1.24  | >50    |
| M1369.A5        | A   | 0.642   | 0.204   | 0.509  | 1.77  | 0.843 | 0.087  |
| MS208.A1        | A   | 1.79    | 1.94    | 3.39   | 1.14  | 0.593 | >50    |
| Q23.17          | A   | 0.149   | 0.117   | 0.352  | 1.60  | 0.212 | 0.019  |
| Q259.17         | A   | 0.147   | 0.032   | 0.080  | 12.0  | 0.242 | >50    |
| Q769.d22        | A   | 1.11    | 0.435   | 1.14   | 4.47  | 0.098 | >50    |
| Q769.h5         | A   | 0.650   | 0.223   | 0.703  | 7.44  | 0.145 | >50    |
| Q842.d12        | A   | 0.169   | 0.096   | 0.351  | 7.58  | 0.075 | 0.047  |
| QH209.14M.A2    | A   | 0.705   | 0.577   | 1.48   | 4.09  | 0.094 | >50    |
| RW020.2         | A   | 0.073   | 0.021   | 0.076  | 2.92  | 0.647 | 0.009  |
| UG037.8         | A   | 0.483   | 0.339   | 0.990  | 0.353 | 0.186 | 0.237  |
| 246-F3.C10.2    | AC  | 0.181   | 0.108   | 0.301  | 1.49  | 0.650 | >50    |
| 3301.V1.C24     | AC  | 0.207   | 0.070   | 0.170  | 9.50  | 0.223 | 0.030  |
| 3589.V1.C4      | AC  | 0.709   | 0.315   | 1.10   | 11.7  | 0.199 | >50    |
| 6540.v4.c1      | AC  | >50     | >50     | >50    | 7.01  | >50   | >50    |
| 6545.V4.C1      | AC  | 31.4    | >50     | >50    | 7.50  | >50   | >50    |
| 0815.V3.C3      | ACD | 0.186   | 0.081   | 0.356  | 1.81  | 0.085 | 0.072  |
| 6095.V1.C10     | ACD | 0.048   | 0.557   | 0.938  | 0.004 | 2.04  | >50    |
| 3468.V1.C12     | AD  | 0.072   | 0.040   | 0.101  | 2.04  | 0.117 | 1.05   |
| Q168.a2         | AD  | 0.382   | 0.127   | 0.377  | 2.88  | 0.230 | >50    |
| Q461.e2         | AD  | 11.5    | 7.51    | 17.0   | 4.68  | 1.02  | >50    |
| 620345.c1       | AE  | >50     | >50     | >50    | 3.73  | >50   | >50    |
| BJOX009000.02.4 | AE  | 0.279   | 0.762   | 1.92   | 1.47  | 4.80  | >50    |
| BJOX010000.06.2 | AE  | 1.70    | 15.5    | >50    | 0.476 | 20.9  | >50    |
| BJOX025000.01.1 | AE  | 2.98    | >50     | >50    | 1.54  | >50   | >50    |
| BJOX028000.10.3 | AE  | 0.432   | 0.804   | 1.01   | 0.876 | 1.03  | >50    |
| C1080.c3        | AE  | 0.973   | 18.1    | 22.4   | 0.613 | 9.98  | >50    |
| C2101.c1        | AE  | 0.816   | 3.46    | 4.64   | 4.12  | 0.581 | >50    |
| C3347.c11       | AE  | 0.060   | 3.82    | 3.88   | 0.089 | 0.452 | >50    |
| C4118.09        | AE  | 1.04    | 5.11    | 7.21   | 2.30  | 0.720 | >50    |
| CM244.ec1       | AE  | 0.913   | 0.741   | 2.48   | 1.46  | 0.452 | >50    |
| CNE3            | AE  | 20.9    | >50     | >50    | 4.01  | 11.0  | >50    |
| CNE5            | AE  | 1.67    | 3.00    | 11.0   | 2.52  | 0.914 | >50    |
| CNE55           | AE  | 1.44    | 4.29    | 17.1   | 0.605 | 0.933 | >50    |
| CNE56           | AE  | 2.06    | 7.51    | 28.5   | 0.314 | 1.30  | >50    |
| CNE59           | AE  | 0.339   | 11.8    | 9.43   | 0.010 | 1.70  | >50    |
| CNE8            | AE  | 0.025   | 1.46    | 4.45   | 1.42  | 0.965 | >50    |
| M02138          | AE  | 0.135   | 21.4    | 25.8   | 0.126 | 3.02  | >50    |
| R1166.c1        | AE  | 0.463   | 13.7    | 44.6   | 2.02  | 5.39  | >50    |
| R2184.c4        | AE  | 1.94    | 2.26    | 6.10   | 2.20  | 0.288 | >50    |
| R3265.c6        | AE  | 4.97    | 9.74    | 19.7   | 9.28  | 1.41  | >50    |
| TH023.6         | AE  | 0.115   | 21.1    | 4.46   | 0.034 | 5.75  | >50    |
| TH966.8         | AE  | 0.180   | 5.60    | 12.7   | 0.291 | 0.983 | >50    |
| TH976.17        | AE  | 1.18    | 2.93    | 7.63   | 1.75  | 0.726 | >50    |
| 235-47          | AG  | 0.309   | 0.265   | 0.857  | 0.786 | 0.154 | 0.842  |
| 242-14          | AG  | 8.76    | >50     | >50    | 3.17  | >50   | >50    |
| 263-8           | AG  | 1.00    | 0.674   | 2.34   | 0.991 | 0.536 | 7.73   |
| 269-12          | AG  | 0.308   | 0.155   | 0.632  | 0.475 | 0.679 | 1.26   |
| 271-11          | AG  | 0.078   | 0.028   | 0.096  | 4.34  | 0.200 | >50    |
| 928-28          | AG  | 0.677   | 2.92    | 7.95   | 0.365 | 0.968 | >50    |
| DJ263.8         | AG  | 0.061   | 0.090   | 0.328  | 0.100 | 0.490 | 0.202  |
| T250-4          | AG  | 0.092   | 0.024   | 0.078  | 3.45  | >50   | 0.012  |
| T251-18         | AG  | 0.951   | 8.52    | 26.9   | 2.55  | 12.0  | >50    |
| T253-11         | AG  | 1.16    | 0.603   | 5.03   | 4.05  | 1.23  | >50    |
| T255-34         | AG  | 0.160   | 0.141   | 0.312  | 1.14  | 1.31  | >50    |
| T257-31         | AG  | 1.16    | 1.21    | 4.87   | 1.58  | 4.55  | >50    |

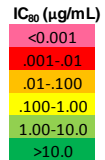

## Supplementary Figure 7

|                 |    | Tri-NAb | Bi-ScFv | Bi-NAb | 10E8   | VRC01 | PGT121 |
|-----------------|----|---------|---------|--------|--------|-------|--------|
| T266-60         | AG | 3.57    | 1.64    | 5.19   | >50    | 5.78  | 0.620  |
| T278-50         | AG | >50     | >50     | >50    | 2.10   | >50   | >50    |
| T280-5          | AG | 0.103   | 0.043   | 0.129  | 4.77   | 0.094 | 0.010  |
| T33-7           | AG | 0.367   | 0.236   | 0.545  | 2.83   | 0.047 | >50    |
| 3988.25         | B  | 0.084   | 0.058   | 0.118  | 0.293  | 1.12  | 0.008  |
| 5768.04         | B  | 0.318   | 0.108   | 0.245  | 5.26   | 0.956 | 0.897  |
| 6101.10         | B  | 0.038   | 0.057   | 0.132  | 0.005  | 0.112 | 0.018  |
| 6535.3          | B  | 0.031   | 0.029   | 0.122  | 1.28   | 5.77  | 0.011  |
| 7165.18         | B  | 0.355   | 0.218   | 0.489  | 2.71   | >50   | 0.074  |
| 45_01dG5        | B  | 0.058   | 0.028   | 0.131  | 0.703  | 0.047 | 0.009  |
| 89.6.DG         | B  | 0.052   | 0.410   | 0.444  | 1.48   | 2.03  | 0.077  |
| AC10.29         | B  | 0.549   | 0.475   | 1.21   | 0.512  | 2.76  | 0.118  |
| ADA.DG          | B  | 0.097   | 0.225   | 0.474  | 0.358  | 1.32  | 0.015  |
| Bal.01          | B  | 0.079   | 0.023   | 0.073  | 1.91   | 0.307 | 0.044  |
| Bal.26          | B  | 0.132   | 0.063   | 0.100  | 2.39   | 0.138 | 0.050  |
| BG1168.01       | B  | 1.68    | 5.61    | 5.88   | 1.48   | 3.57  | >50    |
| BL01.DG         | B  | 22.8    | >50     | >50    | 1.57   | >50   | >50    |
| BR07.DG         | B  | 0.171   | 0.492   | 0.998  | 0.445  | 4.69  | 0.338  |
| BX08.16         | B  | 0.102   | 0.198   | 0.223  | 1.30   | 1.09  | 0.007  |
| CAAN.A2         | B  | 0.170   | 0.116   | 0.300  | 5.70   | 3.71  | 0.027  |
| CNE10           | B  | 0.094   | 0.065   | 0.207  | 0.169  | 1.59  | 0.027  |
| CNE12           | B  | 0.102   | 0.061   | 0.169  | 1.09   | 2.14  | 0.014  |
| CNE14           | B  | 0.071   | 0.035   | 0.109  | 0.649  | 0.813 | 0.007  |
| CNE4            | B  | 0.579   | 1.19    | 2.69   | 0.437  | 2.96  | >50    |
| CNE57           | B  | 0.165   | 0.117   | 0.427  | 0.317  | 1.26  | 0.035  |
| HO86.8          | B  | 45.9    | >50     | >50    | 1.52   | >50   | >50    |
| HT593.1         | B  | 0.441   | 1.47    | 3.63   | 0.285  | 1.62  | >50    |
| HXB2.DG         | B  | 0.028   | 0.019   | 0.166  | 0.015  | 0.093 | >50    |
| JRC5F.JB        | B  | 0.452   | 0.126   | 0.747  | 1.89   | 0.925 | 0.219  |
| JRFLJB          | B  | 0.156   | 0.062   | 0.223  | 0.768  | 0.087 | 0.071  |
| MN.3            | B  | 0.026   | 0.035   | 0.138  | 0.0010 | 0.063 | >50    |
| PVO.04          | B  | 2.37    | 1.21    | 3.10   | 6.43   | 1.20  | 0.436  |
| QH0515.01       | B  | 1.91    | 1.08    | 2.99   | 5.54   | 2.85  | >50    |
| QH0692.42       | B  | 1.59    | 2.41    | 4.40   | 2.35   | 3.98  | 9.70   |
| REJO.67         | B  | 0.254   | 0.105   | 0.415  | 1.18   | 0.180 | >50    |
| RHPA.7          | B  | 0.246   | 0.102   | 0.300  | 5.10   | 0.112 | 0.046  |
| SC422.8         | B  | 0.934   | 0.474   | 1.10   | 1.15   | 0.321 | 0.362  |
| SF162.LS        | B  | 0.032   | 0.004   | 0.041  | 1.06   | 0.580 | 0.017  |
| SS1196.01       | B  | 0.014   | 0.051   | 0.144  | 1.25   | 0.679 | 0.011  |
| THRO.18         | B  | 1.13    | 6.69    | 12.5   | 0.587  | 9.91  | >50    |
| TRJO.58         | B  | 1.02    | 0.777   | 2.25   | 4.18   | 0.231 | >50    |
| TRO.11          | B  | 0.150   | 0.098   | 0.326  | 0.286  | 1.19  | 0.032  |
| WITO.33         | B  | 0.365   | 0.800   | 2.98   | 0.305  | 0.295 | 3.25   |
| X2278.C2.B6     | B  | 0.196   | 0.140   | 0.410  | 2.24   | 0.356 | 0.034  |
| YU2.DG          | B  | 0.181   | 0.111   | 0.500  | 5.46   | 0.188 | 0.178  |
| BJOX002000.03.2 | BC | 0.273   | 0.129   | 0.337  | 1.56   | >50   | 0.068  |
| CH038.12        | BC | 0.094   | 0.109   | 0.241  | 1.41   | 1.04  | 0.020  |
| CH070.1         | BC | 0.014   | 0.116   | 0.272  | 13.5   | >50   | 0.015  |
| CH117.4         | BC | 0.060   | 0.026   | 0.125  | 0.859  | 0.241 | >50    |
| CH119.10        | BC | 0.153   | 0.176   | 0.514  | 2.36   | 2.15  | 0.116  |
| CH181.12        | BC | 0.253   | 0.134   | 0.334  | 2.79   | 1.22  | 0.039  |
| CNE15           | BC | 0.062   | 0.235   | 0.709  | 2.97   | 0.375 | >50    |
| CNE19           | BC | 0.024   | 0.010   | 0.044  | 1.11   | 0.659 | 0.063  |
| CNE20           | BC | 0.059   | 0.009   | 0.036  | 0.732  | >50   | 0.008  |
| CNE21           | BC | 0.129   | 0.081   | 0.236  | 3.25   | 0.903 | 0.018  |
| CNE40           | BC | 0.048   | 0.855   | 1.29   | 0.009  | 4.55  | 1.85   |
| CNE7            | BC | 0.206   | 0.146   | 0.558  | 0.603  | 0.605 | 0.096  |
| 286.36          | C  | 0.054   | 0.023   | 0.085  | 5.00   | 0.715 | 0.009  |
| 288.38          | C  | 0.022   | 0.106   | 0.176  | 3.08   | 3.46  | 0.035  |
| 0013095-2.11    | C  | 0.025   | 0.639   | 2.57   | 0.077  | 0.287 | >50    |
| 001428-2.42     | C  | 0.144   | 0.062   | 0.217  | 6.28   | 0.035 | 0.076  |
| 0077_V1.C16     | C  | 1.12    | 0.697   | 1.82   | 7.11   | 3.10  | >50    |
| 00836-2.5       | C  | 0.078   | 0.021   | 0.107  | 1.77   | 0.462 | >50    |
| 0921.V2.C14     | C  | 0.280   | 0.090   | 0.325  | 3.03   | 0.519 | >50    |
| 16055-2.3       | C  | 0.125   | 0.046   | 0.159  | 3.31   | 0.224 | 12.2   |
| 16845-2.22      | C  | 0.389   | 11.2    | 22.6   | 0.172  | 12.3  | >50    |
| 16936-2.21      | C  | 0.030   | 0.033   | 0.111  | 1.31   | 0.435 | 0.013  |
| 25710-2.43      | C  | 0.130   | 0.108   | 0.396  | 0.304  | 1.40  | 0.055  |
| 25711-2.4       | C  | 0.160   | 0.081   | 0.242  | 1.69   | 1.44  | 0.041  |
| 25925-2.22      | C  | 0.224   | 0.142   | 0.442  | 1.53   | 1.34  | 0.072  |
| 26191-2.48      | C  | 0.543   | 0.331   | 0.953  | 4.90   | 0.679 | 0.393  |
| 3168.V4.C10     | C  | 2.05    | 1.50    | 2.64   | 8.18   | 0.325 | 1.94   |

IC<sub>50</sub> (µg/mL)

- <0.001
- .001-.01
- .01-.100
- 100-1.00
- 1.00-10.0
- >10.0

## Supplementary Figure 7

|                  |    | Tri-NAb | Bi-ScFv | Bi-NAb | 10E8  | VRC01 | PGT121 |
|------------------|----|---------|---------|--------|-------|-------|--------|
| 3637.V5.C3       | C  | 9.98    | 37.1    | >50    | 6.68  | 6.17  | >50    |
| 3873.V1.C24      | C  | 0.069   | 0.664   | 2.03   | 15.7  | 6.97  | 0.106  |
| 426c             | C  | 1.20    | 0.967   | 2.48   | 1.60  | 4.41  | >50    |
| 6322.V4.C1       | C  | 12.0    | >50     | 29.0   | 3.68  | >50   | >50    |
| 6471.V1.C16      | C  | >50     | >50     | >50    | 14.9  | >50   | >50    |
| 6631.V3.C10      | C  | 8.27    | 6.28    | 9.28   | 3.36  | >50   | >50    |
| 6644.V2.C33      | C  | 0.100   | 0.075   | 0.448  | 0.124 | 0.421 | 0.171  |
| 6785.V5.C14      | C  | 0.383   | 0.138   | 0.390  | 2.42  | 0.686 | 0.072  |
| 6838.V1.C35      | C  | 0.036   | 0.007   | 0.031  | 1.01  | 0.616 | 0.840  |
| 96ZM651.02       | C  | 0.087   | 0.099   | 0.200  | 0.177 | 2.54  | 0.044  |
| BR025.9          | C  | 0.061   | 0.047   | 0.091  | 1.11  | 2.37  | 0.008  |
| CAP210.E8        | C  | 2.68    | 11.0    | 20.1   | 2.01  | >50   | >50    |
| CAP244.D3        | C  | 0.117   | 1.14    | 3.48   | 1.48  | 3.53  | >50    |
| CAP256.206.C9    | C  | 0.141   | 0.138   | 0.308  | 2.97  | 2.72  | 0.045  |
| CAP45.G3         | C  | 0.483   | 0.398   | 0.963  | 3.41  | >50   | >50    |
| Ce1176.A3        | C  | 0.212   | 0.120   | 0.300  | 1.15  | 4.92  | 0.070  |
| CE703010217.B6   | C  | 0.053   | 0.022   | 0.087  | 0.679 | 0.584 | 0.011  |
| CNE30            | C  | 0.466   | 0.688   | 1.44   | 2.29  | 2.15  | 0.249  |
| CNE31            | C  | 2.93    | 2.23    | 7.20   | 3.57  | 2.10  | 2.68   |
| CNE53            | C  | 0.061   | 0.091   | 0.254  | 1.01  | 0.302 | 0.054  |
| CNE58            | C  | 2.46    | 3.09    | 5.78   | 1.09  | 0.582 | >50    |
| DU123.06         | C  | 0.027   | 0.216   | 0.501  | 0.423 | 46.1  | 0.101  |
| DU151.02         | C  | 0.204   | 0.036   | 0.116  | 1.71  | >50   | 0.021  |
| DU156.12         | C  | 0.045   | 0.030   | 0.117  | 0.120 | 0.188 | 0.023  |
| DU172.17         | C  | 0.197   | 0.244   | 0.480  | 0.238 | >50   | 0.846  |
| DU422.01         | C  | 0.719   | 0.231   | 0.757  | 0.812 | >50   | 0.365  |
| MW965.26         | C  | 0.024   | 0.044   | 0.127  | 0.007 | 0.128 | 0.051  |
| SO18.18          | C  | 0.008   | 0.013   | 0.061  | 4.48  | 0.085 | 0.006  |
| TV1.29           | C  | 3.39    | 0.897   | 1.80   | 0.719 | >50   | 0.318  |
| TZA125.17        | C  | 3.14    | 7.29    | 22.1   | 1.19  | >50   | >50    |
| TZBD.02          | C  | 0.060   | 0.026   | 0.090  | 4.31  | 0.147 | 0.060  |
| ZA012.29         | C  | 0.165   | 0.055   | 0.129  | 4.12  | 0.602 | 0.021  |
| ZM106.9          | C  | 0.155   | 0.059   | 0.161  | >50   | 0.513 | 0.018  |
| ZM109.4          | C  | 0.368   | 0.312   | 0.926  | 1.07  | 0.414 | >50    |
| ZM135.10a        | C  | 0.093   | 3.95    | 7.79   | 0.408 | 6.10  | 9.25   |
| ZM176.66         | C  | 0.171   | 0.232   | 0.727  | 1.73  | 0.207 | >50    |
| ZM197.7          | C  | 0.706   | 3.92    | 15.6   | 0.369 | 1.64  | >50    |
| ZM214.15         | C  | 2.68    | 3.40    | 8.45   | 5.98  | 3.36  | 2.37   |
| ZM215.8          | C  | 0.083   | 0.066   | 0.281  | 0.230 | 0.937 | 0.057  |
| ZM233.6          | C  | 0.322   | 0.199   | 0.628  | 0.737 | 6.95  | >50    |
| ZM249.1          | C  | 0.817   | 1.58    | 3.30   | 2.27  | 0.442 | >50    |
| ZM53.12          | C  | 0.031   | 0.004   | 0.021  | 6.72  | 1.88  | 0.016  |
| ZM55.28a         | C  | 0.726   | 0.358   | 1.06   | 6.78  | 0.629 | 0.233  |
| 3326.V4.C3       | CD | 0.075   | 0.035   | 0.042  | 4.29  | 2.98  | >50    |
| 3337.V2.C6       | CD | 0.178   | 0.119   | 0.241  | 4.87  | 0.211 | >50    |
| 3817.v2.c59      | CD | 4.56    | 35.4    | >50    | 1.43  | >50   | >50    |
| 191821.E6.1      | D  | 3.01    | 1.15    | 3.89   | 5.89  | 1.34  | >50    |
| 231965.c1        | D  | 1.15    | 3.30    | 3.35   | 20.4  | 1.01  | >50    |
| 247-23           | D  | 2.06    | >50     | >50    | 1.29  | 12.3  | >50    |
| 3016.v5.c45      | D  | 0.118   | 0.086   | 0.186  | 2.17  | 0.252 | >50    |
| 57128.vrc15      | D  | 1.03    | 1.37    | 2.73   | 1.50  | >50   | >50    |
| 6405.v4.c34      | D  | 0.357   | 0.255   | 0.645  | 1.80  | 4.24  | 0.080  |
| A03349M1.vrc4a   | D  | 0.462   | 0.184   | 0.433  | 0.663 | 13.9  | 0.155  |
| A07412M1.vrc12   | D  | 0.106   | 0.034   | 0.134  | 0.873 | 0.339 | 0.104  |
| NKU3006.ec1      | D  | 6.89    | 10.1    | 26.7   | 2.46  | 1.29  | >50    |
| UG021.16         | D  | 0.103   | 0.929   | 1.18   | 0.362 | 1.59  | >50    |
| UG024.2          | D  | 0.204   | 7.55    | 2.13   | 0.241 | 0.667 | >50    |
| P0402.c2.11      | G  | 0.019   | 0.064   | 0.188  | 0.460 | 0.488 | 0.026  |
| P1981.C5.3       | G  | 0.072   | 0.018   | 0.054  | 0.124 | 0.691 | 0.013  |
| X1193.c1         | G  | 0.071   | 0.332   | 0.709  | 1.15  | 0.350 | 0.091  |
| X1254.c3         | G  | 0.040   | 0.159   | 0.535  | 15.7  | 0.132 | 0.069  |
| X1632.S2.B10     | G  | 0.251   | 0.322   | 0.582  | 1.76  | 0.526 | >50    |
| X2088.c9         | G  | 0.126   | 0.046   | 0.097  | >50   | >50   | 0.009  |
| X2131.C1.B5      | G  | 0.076   | 0.080   | 0.197  | 0.175 | 1.41  | 0.044  |
| SIVmac251.30.SG3 | NA | >50     | >50     | >50    | >50   | >50   | >50    |
| SVA.MLV          | NA | >50     | >50     | >50    | >50   | >50   | >50    |

IC<sub>80</sub> (µg/mL)

- <0.001
- .001-.01
- .01-.100
- .100-1.00
- 1.00-10.0
- >10.0

## Supplementary Figure 7

|                                | Tri-NAb | Bi-ScFv | Bi-NAb | 1.00E+09 | VRC01 | PGT121 |
|--------------------------------|---------|---------|--------|----------|-------|--------|
| # Viruses                      | 208     | 208     | 208    | 208      | 208   | 208    |
| <b>Total Virus Neutralized</b> |         |         |        |          |       |        |
| IC80 <50 (µg/mL)               | 204     | 196     | 194    | 203      | 182   | 112    |
| IC80 <10 (µg/mL)               | 198     | 185     | 176    | 193      | 175   | 111    |
| IC80 <1.0 (µg/mL)              | 155     | 144     | 122    | 61       | 106   | 99     |
| IC80 <0.1 (µg/mL)              | 55      | 62      | 19     | 10       | 13    | 72     |
| IC80 <0.01 (µg/mL)             | 1       | 4       | 0      | 5        | 0     | 11     |
| <b>% Virus Neutralized</b>     |         |         |        |          |       |        |
| IC80 <50 (µg/mL)               | 98      | 94      | 93     | 98       | 88    | 54     |
| IC80 <10 (µg/mL)               | 95      | 89      | 85     | 93       | 84    | 53     |
| IC80 <1.0 (µg/mL)              | 75      | 69      | 59     | 29       | 51    | 48     |
| IC80 <0.1 (µg/mL)              | 26      | 30      | 9      | 5        | 6     | 35     |
| IC80 <0.01 (µg/mL)             | 0       | 2       | 0      | 2        | 0     | 5      |
| Median IC80 (µg/mL)            | 0.235   | 0.216   | 0.540  | 1.69     | 0.703 | 0.059  |
| Geometric Mean (µg/mL)         | 0.298   | 0.299   | 0.749  | 1.34     | 0.793 | 0.081  |

**IC<sub>80</sub> (µg/mL)**

|           |
|-----------|
| <0.001    |
| .001-.01  |
| .01-.100  |
| .100-1.00 |
| 1.00-10.0 |
| >10.0     |

**Supplementary Figure 7. Summary of IC<sub>80</sub> (µg/ml) for trispecific and bispecific antibodies tested in 208 virus panel.**



**Supplementary Table 1.** Summary of distances between the termini of PGT121 and VRC01 when bound to JR-FL SOSIP.664 trimer\*

| <b>Distance Between PGT121-VRC01 termini</b> |               |                          |                          |                     |
|----------------------------------------------|---------------|--------------------------|--------------------------|---------------------|
| <b>Inter-Protomer</b>                        |               |                          |                          |                     |
| <b>Orientation</b>                           |               |                          |                          |                     |
| <b>VRC01</b>                                 | <b>PGT121</b> | <b>VRC01 C-terminus</b>  | <b>PGT121 N-terminus</b> | <b>Distance (Å)</b> |
| VH-VL                                        | VH-VL         | VAL 106.V CB             | GLN 1.H CB               | 60.663              |
| VH-VL                                        | VL-VH         | VAL 106.V CB             | ALA 6.L CB               | 48.913              |
| VL-VH                                        | VL-VH         | VAL 111.U CB             | ALA 6.L CB               | 37.171              |
| VL-VH                                        | VH-VL         | VAL 111.U CB             | GLN 1.H CB               | 66.444              |
| <b>Orientation</b>                           |               |                          |                          |                     |
| <b>PGT121</b>                                | <b>VRC01</b>  | <b>PGT121 C-terminus</b> | <b>VRC01 N-terminus</b>  | <b>Distance (Å)</b> |
| VH-VL                                        | VH-VL         | VAL 106.L CB             | GLN 1.U CB               | 53.470              |
| VH-VL                                        | VL-VH         | VAL 106.L CB             | VAL 3.V CB               | 63.459              |
| VL-VH                                        | VL-VH         | SER 111.H CB             | VAL 3.V CB               | 96.431              |
| VL-VH                                        | VH-VL         | SER 111.H CB             | GLN 1.U CB               | 77.125              |
| <b>Intra-Protomer</b>                        |               |                          |                          |                     |
| <b>Orientation</b>                           |               |                          |                          |                     |
| <b>VRC01</b>                                 | <b>PGT121</b> | <b>VRC01 C-terminus</b>  | <b>PGT121 N-terminus</b> | <b>Distance (Å)</b> |
| VH-VL                                        | VH-VL         | VAL 106.V CB             | GLN 1.H CB               | 106.920             |
| VH-VL                                        | VL-VH         | VAL 106.V CB             | PRO 7.L CB               | 100.662             |
| VL-VH                                        | VL-VH         | VAL 111.U CB             | ALA 6.L CB               | 73.361              |
| VL-VH                                        | VH-VL         | VAL 111.U CB             | GLN 1.H CB               | 78.762              |
| <b>Orientation</b>                           |               |                          |                          |                     |
| <b>PGT121</b>                                | <b>VRC01</b>  | <b>PGT121 C-terminus</b> | <b>VRC01 N-terminus</b>  | <b>Distance (Å)</b> |
| VH-VL                                        | VH-VL         | VAL 106.L CB             | GLN 1.U CB               | 96.925              |
| VH-VL                                        | VL-VH         | VAL 106.L CB             | VAL 3.V CB               | 94.519              |
| VL-VH                                        | VL-VH         | SER 111.H CB             | VAL 3.V CB               | 93.620              |
| VL-VH                                        | VH-VL         | SER 111.H CB             | GLN 1.U CB               | 94.350              |

\* Inter-protomer and intra-protomer distances were inspected by Chimera, based on antibody-trimer complex structure (PDB: 5FYK). PGT122 serves as a surrogate for PGT121.
